# Supplementary material for: Inhibition of Serum Response Factor Improves Response to Enzalutamide in Prostate Cancer
Source: MDPI journal article supplement (doi:10.3390/cancers12123540), 2020-11-27

# Supplementary materials: Inhibition of Serum Response Factor Improves Response to Enzalutamide in Prostate Cancer

R. William Watson, Haleema Azam, Claudia Aura, Niamh Russell, Janet McCormack, Eva Corey, Colm Morrissey, John Crown, William M Gallagher and Maria Prencipe

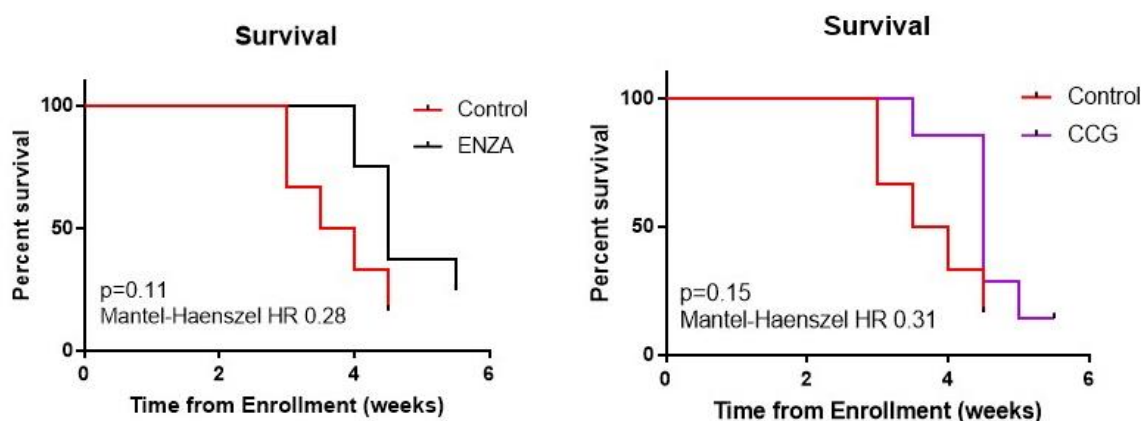

**Figure S1.** Kaplan–Meier survival curves from date of enrolment for controls and single CCG1423/enzalutamide treatment groups.

## Original images

### LNCaP Parental

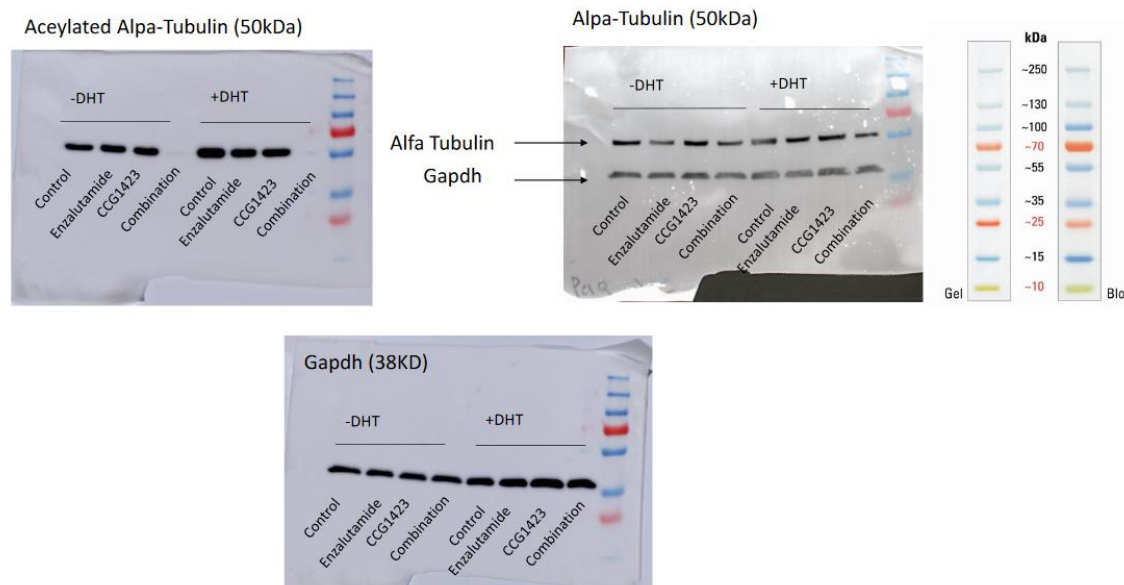

LNCaP Abl

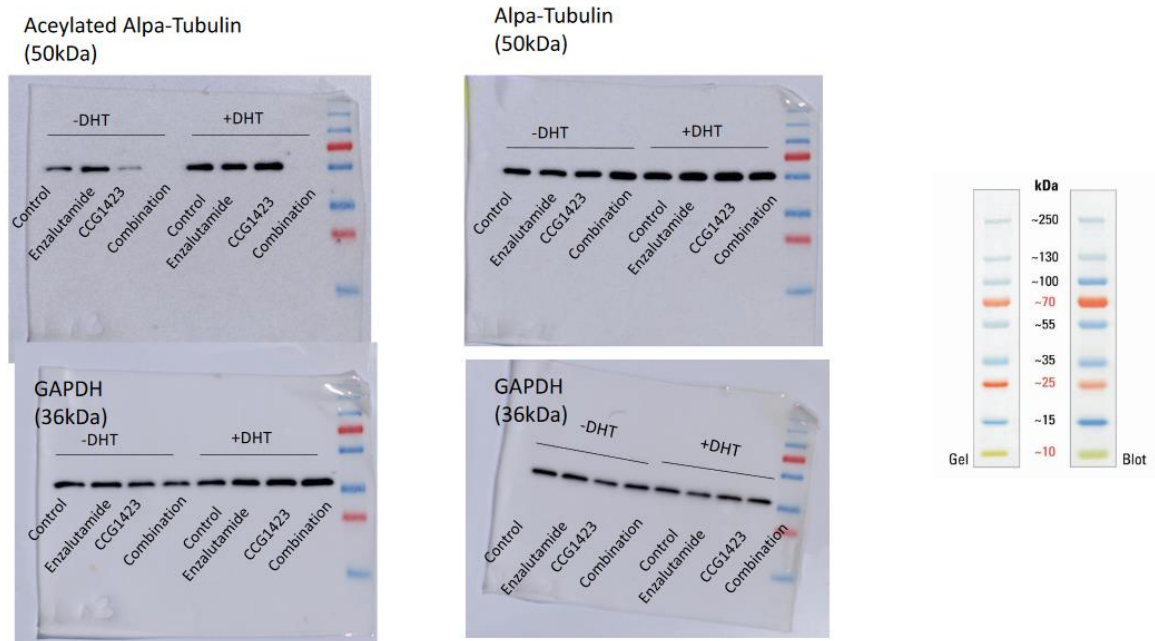

Figure 4. Protein expression of acetylated  $\alpha$ -tubulin assessed by WB in LNCaP parental and Abl cells post-treatments

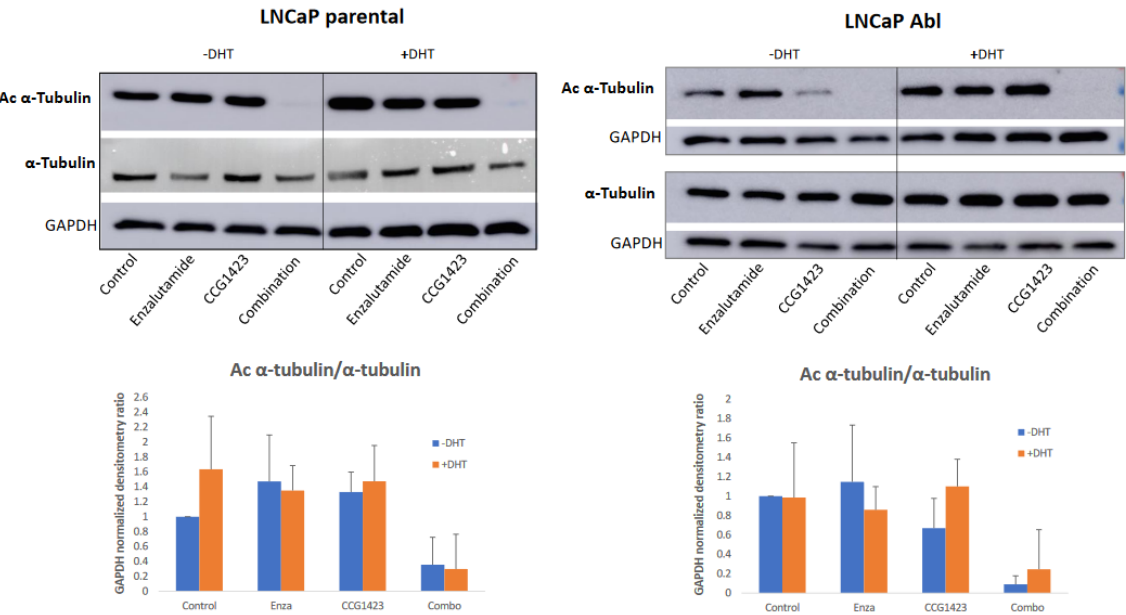

Supplement: s1 [file s1]
